# Supplementary material for: Redundancy and Specificity of Type VI Secretion vgrG Loci in Antibacterial Activity of Agrobacterium tumefaciens 1D1609 Strain
Source: Front Microbiol. 2020 Jan 14;10:3004. doi: 10.3389/fmicb.2019.03004 (PMC6971182; doi:10.3389/fmicb.2019.03004)
Supplement: TABLE S2 — Predicted functions/domains of toxin/s associated with each vgrG based on Phyre or NCBI CDD search and BLASTP. [file Table_2.xlsx]

## Sheet: Sheet1
	V1	V2	V3	V4	V5
VgrGa	DUF2169	DUF4150 (PAAR-like)+AHH nuclease domain	Immunity protein (7 bladed ß-propeller)
VgrGb	DUF2169	DUF4150 (PAAR-like)	ADP-ribosylating toxin domain	Rhs-linked effector and/or Insecticidal Tc toxin	Putative immunity protein (post segregation antitoxin CcdA)
VgrGc	DUF2169	DUF4150 (PAAR-like)+unknown domain	Putative immunity protein
VgrGd	DUF2169	DUF4150 (PAAR-like)+Muramidase domain	Putative immunity protein (DUF2268)
